# Supplementary material for: First-principles study of a MXene terahertz detector
Source: Royal Society of Chemistry journal article supplement (doi:10.1039/c7nr05351g), 2017-11-20
Supplement: c7nr05351g1.pdf [file c7nr05351g1.pdf]

## **Supporting Information**

### **First-principles Study for MXene Terahertz Detector**

Young In Jhon, Minah Seo, and Young Min Jhon\*

Sensor System Research Center, Korea Institute of Science and Technology  
Hwarang-ro 14-gil 5, Seongbuk-gu, Seoul 02792, Republic of Korea

E-mail: ymjhon@kist.re.kr

# Computational Details

**Electronic Structures and Optical Properties:** For the DFT calculations of the electronic band structures and optical properties of MXene and graphene, generalized-gradient approximation with Perdew–Burke–Ernzerhof exchange–correlation functional was employed considering spin-polarization and spin-orbit coupling. The structures of the systems were relaxed with a variable cell size until the maximum force reduced below  $0.05 \text{ eV } \text{\AA}^{-1}$ . The density mesh cutoff energy was set to be 150 hartree.

The size of the optimized hexagonal cell was  $6.31 \text{ \AA} \times 6.31 \text{ \AA} \times 30 \text{ \AA}$  in the monolayer  $\text{Ti}_3\text{C}_2$  while it was  $6.31 \text{ \AA} \times 6.31 \text{ \AA} \times 9.87 \text{ \AA}$  in the stacked  $\text{Ti}_3\text{C}_2$ . The Monkhorst-Pack grid of k-point sampling was set to be  $5 \times 5 \times 1$  and  $5 \times 5 \times 3$  in the geometric optimization of monolayer  $\text{Ti}_3\text{C}_2$  and stacked  $\text{Ti}_3\text{C}_2$ , respectively, while it was taken as  $15 \times 15 \times 1$  and  $15 \times 15 \times 9$  in the calculations of the electronic band structure and optical properties.

Meanwhile, the size of the optimized hexagonal cell was  $2.46 \text{ \AA} \times 2.46 \text{ \AA} \times 30 \text{ \AA}$  in the monolayer graphene while it was  $2.46 \text{ \AA} \times 2.46 \text{ \AA} \times 6.71 \text{ \AA}$  in the stacked graphene. The Monkhorst-Pack of k-point sampling was set to be  $13 \times 13 \times 1$  and  $13 \times 13 \times 5$  in the geometric optimization of monolayer graphene and stacked graphene, respectively, while it was taken as  $39 \times 39 \times 1$  and  $39 \times 39 \times 15$  in the calculations of the electronic band structure and optical properties.

**Thermoelectric Properties:** In the analysis of thermoelectric figure of merit (ZT) of stacked  $\text{Ti}_3\text{C}_2$  flakes, the phonon transmission spectrum was obtained using a molecular mechanics based on the reactive force field with the k-mesh of  $71 \times 23$  and solving the dynamic matrix of the supercell of  $9 \times 3 \times 1$ , while the electron transmission spectrum was calculated using a density-functional tight-binding approach based on the Slater-Koster method with the k-mesh of  $27 \times 9$ . The mesh of  $k_z$  in the electrodes was 100.

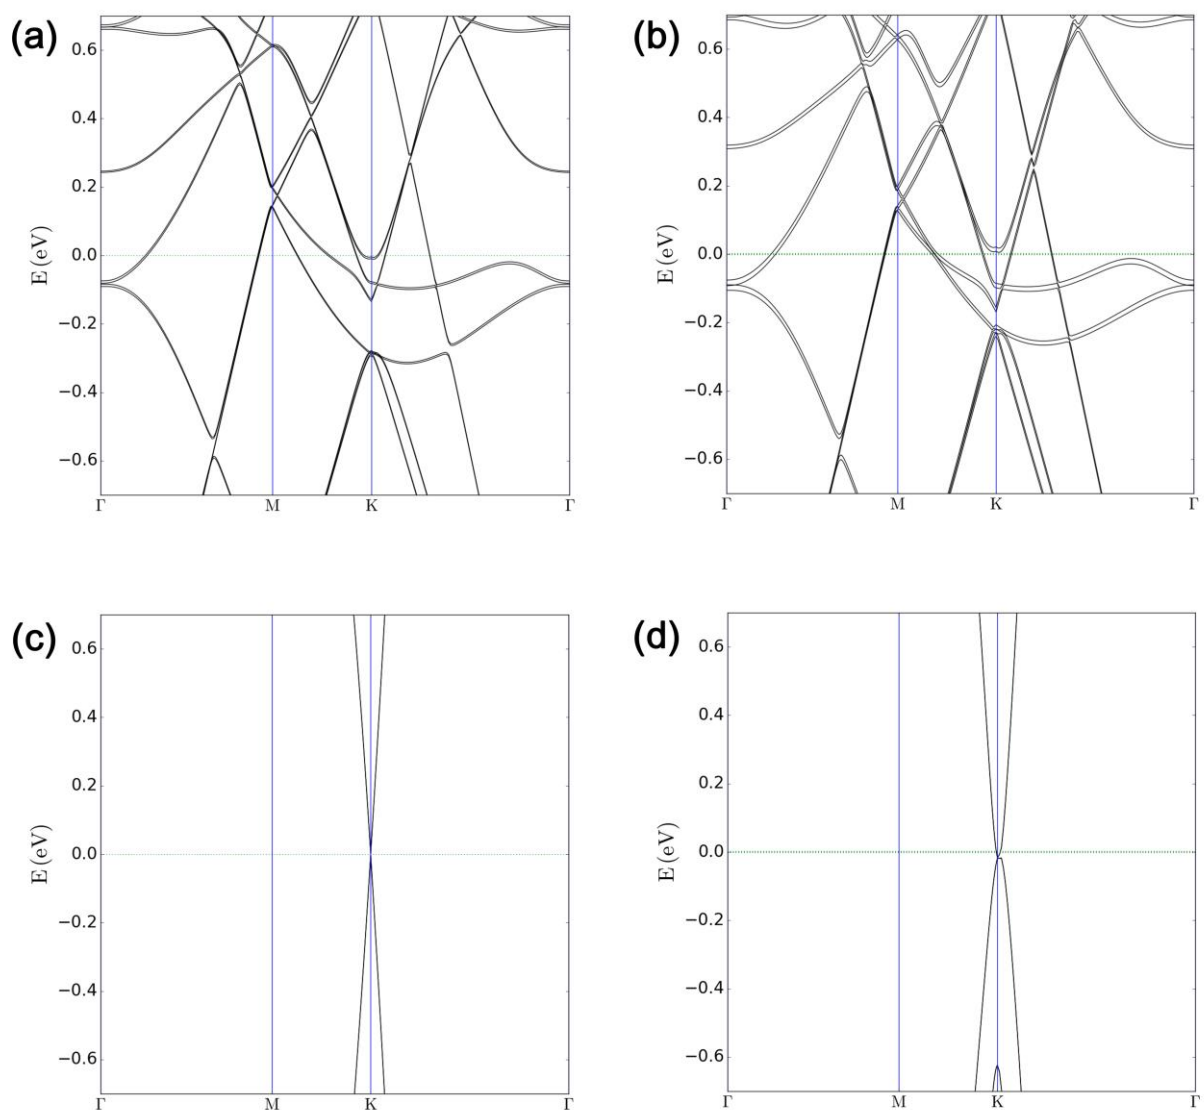

**Figure S1.** The electronic band structures of (a) monolayer  $\text{Ti}_3\text{C}_2$ , (b) stacked  $\text{Ti}_3\text{C}_2$ , (c) monolayer graphene, and (d) stacked graphene.

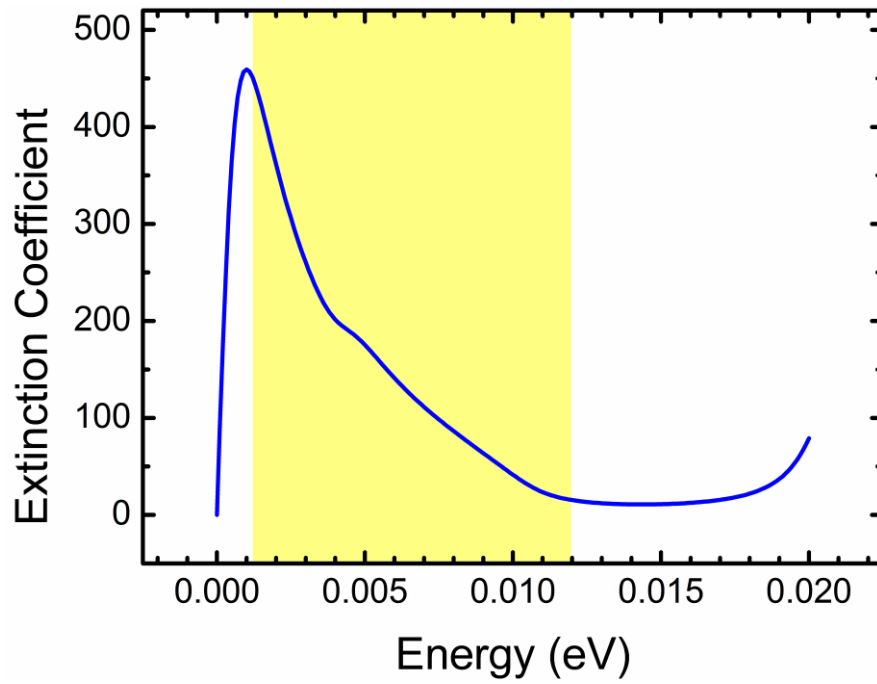

**Figure S2.** The extinction coefficient spectrum of monolayer  $\text{Ti}_3\text{C}_2$  in the THz range. The shaded region indicates the THz range.

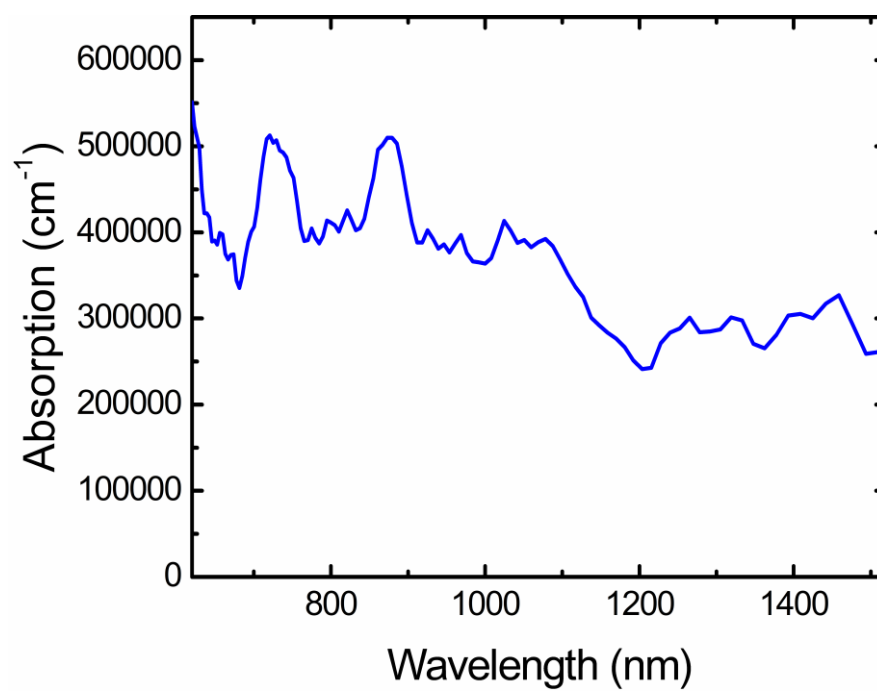

**Figure S3.** The visible to near-infrared optical absorption spectrum of stacked  $\text{Ti}_3\text{C}_2$ .

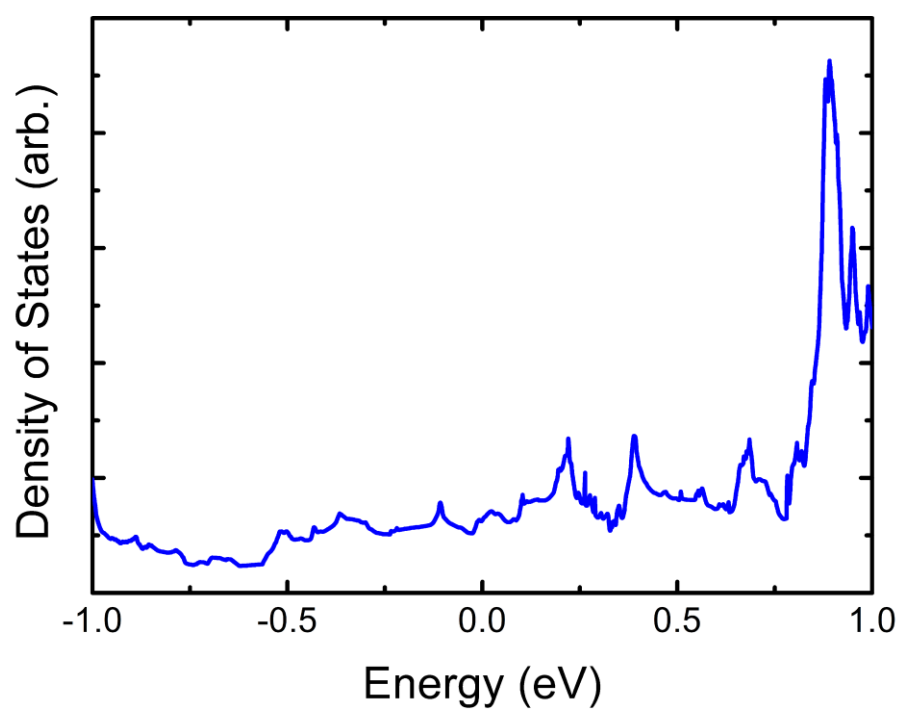

**Figure S4.** The electronic density of states of stacked  $\text{Ti}_3\text{C}_2$  with interlayer water molecules.
